# Supplementary material for: Vitamin D supplementation to palliative cancer patients shows positive effects on pain and infections—Results from a matched case-control study
Source: PubMed Central journal article supplement (PMC5578640; doi:10.1371/journal.pone.0184208), 2017-08-31
Supplement: pone.0184208.s001.pdf [file pone.0184208.s001.pdf]

Supplementary Information

S1 Table 1

S1 Table 1

| Cases<br>(vitamin<br>D) | Sex<br>1=mal<br>e | 25-<br>OHD<br>nmol/L | CRP<br>mg/<br>L | Albumi<br>n<br>g/L | QoL                        |            |            | Infections                                             |            |            | Pain                           |            |            | survival<br>time |               | Cancer                       | ongoing<br>chemo<br>therapy | ongoing<br>anithor<br>m.<br>therapy | 25-OHD<br>3<br>months<br>nmol/L |
|-------------------------|-------------------|----------------------|-----------------|--------------------|----------------------------|------------|------------|--------------------------------------------------------|------------|------------|--------------------------------|------------|------------|------------------|---------------|------------------------------|-----------------------------|-------------------------------------|---------------------------------|
|                         |                   |                      |                 |                    | ESAS-score<br>baselin<br>e | 1<br>month | 3<br>month | percentage<br>days with<br>antibiotics<br>baselin<br>e | 1<br>month | 3<br>month | Phentanyl/hour<br>baselin<br>e | 1<br>month | 3<br>month | >3 months        | > 6<br>months |                              |                             |                                     |                                 |
| 1                       | 1                 | 10                   | 4               | 30                 | 7                          | 5          | 3          | 0,1                                                    | 0          | 0          | 75                             | 25         | 0          | 1                | 1             | GI                           | 1                           |                                     | 78                              |
| 2                       | 1                 | 10                   | 9               | 29                 | nd                         | nd         | nd         | 0                                                      | 0          | 0          | 100                            | 75         | 37         | 1                | 1             | Pancreas                     | 0                           |                                     | 75                              |
| 3                       | 0                 | 8                    | 194             | 19                 | 8                          | 8          | nd         | 0,3                                                    | 0,2        | nd         | 100                            | 200        | nd         | 0                | 0             | Gyn                          | 0                           |                                     |                                 |
| 4                       | 0                 | 56                   | 8               | 26                 | 2                          | 2          | 7          | 0,33                                                   | 0,07       | 0          | 0                              | 0          | 0          | 1                | 0             | Breast                       | 1                           |                                     | 105                             |
| 5                       | 0                 | 35                   | 245             | 17                 | 8                          | 8          | nd         | 0,33                                                   | 0,33       | nd         | 25                             | 0          | nd         | 0                | 0             | Lungcancer                   | 0                           |                                     |                                 |
| 6                       | 0                 | 10                   | 10              | 28                 | 4                          | 4          | 0          | 0                                                      | 0          | 0          | 25                             | 12         | 0          | 1                | 1             | Pancreas<br>Cholangiocarcino | 1                           |                                     | 48                              |
| 7                       | 0                 | 37                   | 77              | 23                 | 10                         | 3          | nd         | 0,23                                                   | 0          | nd         | 125                            | 137        | nd         | 0                | 0             | ma<br>Cholangiocarcino       | 0                           |                                     |                                 |
| 8                       | 1                 | 12                   | 8               | 15                 | 4                          | 6          | nd         | 0,33                                                   | 0,3        | nd         | 25                             | 75         | nd         | 0                | 0             | ma                           | 0                           |                                     |                                 |
| 9                       | 0                 | 20                   | 1               | 40                 | 5                          | 2          | 2          | 0                                                      | 0          | 0          | 12                             | 12         | 0          | 1                | 0             | Head-Neck                    | 0                           |                                     | 56                              |
| 10                      | 0                 | 11                   | 15              | 32                 | 7                          | 5          | 5          | 0,42                                                   | 0,4        | 0          | 12                             | 0          | 0          | 1                | 0             | Breast                       | 1                           | 1                                   |                                 |
| 11                      | 0                 | 20                   | 5               | 26                 | 6                          | 3          | 3          | 0                                                      | 0,33       | 0,33       | 12                             | 0          | 0          | 1                | 1             | Breast                       | 1                           |                                     | 78                              |
| 12                      | 0                 | 41                   | 23              | 28                 | 4                          | 5          | 6          | 0                                                      | 0,47       | nd         | 25                             | 75         | nd         | 0                | 0             | Lungcancer                   | 0                           |                                     |                                 |
| 13                      | 1                 | 31                   | 22              | 21                 | 7                          | 5          | 5          | 0,33                                                   | 0,17       | nd         | 0                              | 0          | nd         | 0                | 0             | GI                           | 0                           |                                     |                                 |
| 14                      | 0                 | 27                   | 33              | 28                 | 5                          | 5          | nd         | 0,21                                                   | 0          | nd         | 12                             | 6          | nd         | 0                | 0             | GI                           | 0                           |                                     |                                 |
| 15                      | 0                 | 59                   | 3               | 30                 | 5                          | 3          | 3          | 0,27                                                   | 0,5        | 0          | 50                             | 50         | 50         | 1                | 1             | Breast                       | 1                           | 1                                   | 116                             |
| 16                      | 0                 | 23                   | 22              | 32                 | 1                          | 0          | 0          | 0                                                      | 0          | 0          | 12                             | 12         | 12         | 1                | 1             | Lungcancer                   | 1                           |                                     | 87                              |
| 17                      | 1                 | 29                   | 16              | 26                 | 7                          | 1          | 1          | 0,6                                                    | 0          | 0          | 25                             | 25         | 25         | 1                | 1             | Prostata                     | 1                           | 1                                   | 66                              |
| 18                      | 0                 | 27                   | 10              | 29                 | 5                          | 3          | 4          | 0,17                                                   | 0          | 0          | 12                             | 12         | 12         | 1                | 1             | Pancras                      | 1                           |                                     | 56                              |

|    |   |     |     |    |    |    |    |      |      |      |     |     |     |   |   |             |   |     |
|----|---|-----|-----|----|----|----|----|------|------|------|-----|-----|-----|---|---|-------------|---|-----|
| 19 | 1 | 28  | 238 | 22 | 7  | 2  | 8  | 0,37 | 0    | 0    | 250 | 300 | 300 | 1 | 0 | GI          | 1 |     |
| 20 | 0 | 13  | 2   | 32 | 2  | 0  | 0  | 0    | 0    | 0    | 12  | 12  | 6   | 1 | 1 | Gyn         | 1 | 103 |
| 21 | 1 | 112 | 40  | 33 | 5  | 3  | 7  | 0    | 0    | 0,27 | 12  | 25  | 50  | 1 | 0 | Prostate    | 1 | 1   |
| 22 | 1 | 91  | 102 | 22 | 4  | 8  | nd | 0,3  | 0,73 | nd   | 0   | 0   | nd  | 0 | 0 | Head-Neck   | 0 |     |
| 23 | 0 | 21  | 4   | 26 | 5  | 2  | 7  | 0    | 0    | 0,23 | 0   | 0   | 0   | 1 | 0 | Breast      | 1 | 1   |
| 24 | 0 | 62  | 20  | 34 | 5  | 4  | 5  | 0    | 0    | 0    | 0   | 0   | 0   | 1 | 1 | GI          | 0 | 32  |
| 25 | 0 | 21  | 4   | 30 | nd | nd | nd | 0    | 0    | 0    | 0   | 0   | 0   | 1 | 1 | Breast      | 1 | 55  |
| 26 | 1 | 10  | 14  | 25 | 7  | 7  | 5  | 0    | 0    | 0    | 25  | 0   | 0   | 1 | 0 | Prostata    | 1 | 1   |
| 27 | 1 | 105 | 1   | 39 | 8  | 7  | 8  | 0    | 0    | 0    | 12  | 12  | 0   | 1 | 1 | GI          | 0 | 83  |
| 28 | 0 | 41  | 208 | 26 | 5  | 5  | nd | 0    | 0    | nd   | 0   | 0   | nd  | 0 | 0 | Gyn         | 1 |     |
| 29 | 1 | 37  | 1   | 30 | 5  | 4  | 4  | 0    | 0    | 0    | 0   | 0   | 0   | 1 | 0 | Brain tumor | 0 |     |
| 30 | 1 | 10  | 4   | 37 | 8  | 7  | 5  | 0    | 0    | 0    | 25  | 25  | 12  | 1 | 1 | GI          | 1 | 30  |
| 31 | 0 | 52  | 13  | 39 | 1  | 0  | nd | 0    | 0    | nd   | 0   | 0   | nd  | 0 | 0 | Pancreas    | 0 |     |
| 32 | 1 | 38  | 1   | 28 | 5  | 5  | 6  | 0,3  | 0    | 0    | 0   | 0   | 0   | 1 | 0 | Prostata    | 1 | 1   |
| 33 | 1 | 16  | 1   | 31 | 7  | 8  | 4  | 0,2  | 0    | 0    | 0   | 0   | 0   | 1 | 0 | GI          | 1 | 46  |
| 34 | 1 | 8   | 1   | 30 | 3  | 2  | 3  | 0    | 0    | 0    | 25  | 0   | 12  | 1 | 0 | GI          | 1 | 8   |
| 35 | 1 | 27  | 196 | 24 | 7  | 7  | nd | 0,2  | 0    | nd   | 50  | 175 | nd  | 0 | 0 | Prostata    | 1 | 1   |
| 36 | 0 | 26  | 1   | 34 | 8  | 7  | 6  | 0    | 0    | 0    | 25  | 50  | 50  | 1 | 1 | Lungcancer  | 0 | 93  |
| 37 | 0 | 68  | 1   | 37 | 6  | 5  | 3  | 0,43 | 0    | 0    | 0   | 0   | 0   | 1 | 1 | GI          | 1 | 68  |
| 38 | 1 | 12  | 32  | 24 | 4  | 6  | nd | 0    | 0    | nd   | 25  | 0   | nd  | 0 | 0 | GI          | 0 |     |
| 39 | 1 | 38  | 232 | 21 | 6  | 4  | nd | 0,73 | 0,1  | nd   | 100 | 112 | nd  | 0 | 0 | Lungcancer  | 0 |     |

| Controls<br>(untreated) | Sex<br>1=male | 25-<br>OHD<br>nmol/L | CRP<br>mg/<br>L | Albumi<br>n<br>g/L | QoL                    |            |            | Infections             |            |            | Pain                          |            |            | survival<br>time |               | Cancer   | ongoing<br>chemo | ongoing<br>anithor<br>m.<br>therapy |
|-------------------------|---------------|----------------------|-----------------|--------------------|------------------------|------------|------------|------------------------|------------|------------|-------------------------------|------------|------------|------------------|---------------|----------|------------------|-------------------------------------|
|                         |               |                      |                 |                    | ESAS-score<br>baseline | 1<br>month | 3<br>month | percentage<br>baseline | 1<br>month | 3<br>month | Phentany/<br>hour<br>baseline | 1<br>month | 3<br>month | >3 months        | > 6<br>months |          |                  |                                     |
| 1                       | 1             | 58                   | 18              | 30                 | nd                     | nd         | nd         | 0                      | 0          | 0,47       | 0                             | 0          | 12         | 1                | 1             | GI       | 0                |                                     |
| 2                       | 1             | 27                   | 141             | 17                 | 2                      | 4          | 4          | 0                      | 0          | 1          | 125                           | 125        | 150        | 1                | 1             | Pancreas | 0                |                                     |
| 3                       | 0             | 39                   | 42              | 31                 | 0                      | 0          | nd         | 0,1                    | 0,37       |            | 137                           | 200        | nd         | 0                | 0             | Gyn      | 0                |                                     |

|    |   |    |     |    |    |    |    |      |      |      |     |     |     |   |   |                              |   |   |
|----|---|----|-----|----|----|----|----|------|------|------|-----|-----|-----|---|---|------------------------------|---|---|
| 4  | 0 | 33 | ND  | 28 | 3  | 7  | 7  | 0    | 0,23 | 0,53 | 75  | 75  | 100 | 1 | 0 | Breast                       | 1 | 1 |
| 5  | 0 | 39 | 278 | 23 | 3  | 4  | nd | 0    | 0    | nd   | 50  | 75  | nd  | 0 | 0 | Lungcancer                   | 0 |   |
| 6  | 0 | 20 | 83  | 18 | 4  | 4  | 8  | 0,67 | 0    | 0,47 | 25  | 150 | 250 | 1 | 1 | Pancreas<br>Cholangiocarcino | 0 |   |
| 7  | 0 | 13 | 144 | 13 | 4  | 6  | nd | 0    | 0,3  | nd   | 12  | 50  | nd  | 0 | 0 | ma<br>Cholangiocarcino       | 0 |   |
| 8  | 1 | 27 | 51  | 16 | 6  | 7  | nd | 0    | 0,4  | nd   | 0   | 0   | nd  | 0 | 0 | ma                           | 0 |   |
| 9  | 0 | 49 | 17  | 34 | 6  | 6  | 5  | 0    | 0,8  | 0,5  | 0   | 0   | 0   | 1 | 0 | Head-Neck                    | 1 |   |
| 10 | 0 | 43 | 7   | 32 | 8  | 3  | 4  | 0,1  | 0,33 | 0    | 25  | 50  | 300 | 1 | 0 | Breast                       | 1 | 1 |
| 11 | 0 | 66 | 102 | 21 | 3  | 3  | 1  | 0    | 0,33 | 0,33 | 0   | 12  | 50  | 1 | 1 | Breast                       | 1 |   |
| 12 | 0 | 47 | 24  | 29 | 2  | 0  | nd | 0    | 0,33 | nd   | 37  | 75  | nd  | 0 | 0 | Lungcancer                   | 0 |   |
| 13 | 1 | 14 | 19  | 19 | 10 | 10 | nd | 0    | 0    | nd   | 0   | 0   | nd  | 0 | 0 | GI                           | 0 |   |
| 14 | 0 | 8  | 23  | 30 | 1  | 1  | nd | 0,33 | 0    | nd   | 112 | 250 | nd  | 0 | 0 | GI                           | 0 |   |
| 15 | 0 | 28 | 56  | 26 | 5  | 4  | 4  | 1    | 1    | 1    | 37  | 75  | 75  | 1 | 1 | Breast                       | 1 | 1 |
| 16 | 0 | 70 | 300 | 26 | 4  | nd | 0  | 0    | 0,5  | 0    | 0   | 0   | 0   | 1 | 1 | Lungcancer                   | 1 |   |
| 17 | 1 | 20 | 9   | 22 | 3  | 3  | 5  | 0    | 0    | 0    | 12  | 12  | 12  | 1 | 1 | Prostata                     | 1 | 1 |
| 18 | 0 | 46 | 2   | 35 | 1  | 7  | 6  | 0    | 0    | 0    | 25  | 25  | 25  | 1 | 1 | Pancras                      | 1 |   |
| 19 | 1 | 9  | 26  | 30 | 4  | 3  | 3  | 0    | 0    | 0,03 | 37  | 350 | 350 | 1 | 0 | GI                           | 1 |   |
| 20 | 0 | 45 | 23  | 34 | 2  | 2  | 4  | 1    | 1    | 1    | 0   | 0   | 0   | 1 | 1 | Gyn                          | 1 |   |
| 21 | 1 | 56 | ND  | 33 | 6  | 6  | 7  | 0    | 0    | 0    | 50  | 75  | 100 | 1 | 0 | Prostate                     | 1 | 1 |
| 22 | 1 | 72 | 178 | 20 | 4  | 2  | nd | 0,27 | 0,2  | nd   | 25  | 75  | nd  | 0 | 0 | Head-Neck                    | 0 |   |
| 23 | 0 | 33 | 19  | 30 | 8  | 0  | 5  | 0    | 0    | 0,03 | 25  | 50  | 100 | 1 | 0 | Breast                       | 1 | 1 |
| 24 | 0 | 86 | 43  | 32 | 4  | 4  | 7  | 0    | 0    | 1    | 0   | 225 | 300 | 1 | 1 | GI                           | 1 |   |
| 25 | 0 | 65 | 5   | 36 | 4  | 1  | 2  | 0    | 0    | 0    | 50  | 150 | 125 | 1 | 1 | Breast                       | 1 |   |
| 26 | 1 | 42 | 16  | 30 | 3  | 8  | 5  | 0    | 0    | 0    | 125 | 125 | 125 | 1 | 0 | Prostata                     | 1 | 1 |
| 27 | 1 | 35 | 7   | 37 | 1  | 0  | 0  | 0    | 0    | 0    | 50  | 50  | 37  | 1 | 1 | GI                           | 1 |   |
| 28 | 0 | 11 | 15  | 34 | 10 | 8  | nd | 0,5  | 0,17 | nd   | 87  | 150 | nd  | 0 | 0 | Gyn                          | 0 |   |
| 29 | 1 | 39 | 12  | 33 | 6  | 6  | 7  | 0    | 0    | 0,33 | 0   | 0   | 0   | 1 | 0 | Brain tumor                  | 0 |   |
| 30 | 1 | 26 | 101 | 19 | 1  | 1  | 6  | 0    | 0,5  | 0,2  | 75  | 150 | 350 | 1 | 1 | GI                           | 1 |   |
| 31 | 0 | 34 | 4   | 28 | 5  | 5  | nd | 0,63 | 0    | nd   | 0   | 0   | nd  | 0 | 0 | Pancreas                     | 0 |   |
| 32 | 1 | 24 | 1   | 27 | 3  | 3  | 4  | 0    | 0    | 0    | 0   | 25  | 175 | 1 | 0 | Prostata                     | 1 | 1 |

|    |   |    |     |    |    |    |    |      |      |      |     |     |     |   |   |            |   |   |
|----|---|----|-----|----|----|----|----|------|------|------|-----|-----|-----|---|---|------------|---|---|
| 33 | 1 | 41 | ND  | 27 | 5  | 5  | 5  | 0    | 0    | 0,03 | 12  | 12  | 100 | 1 | 0 | GI         | 0 |   |
| 34 | 1 | 32 | 147 | 23 | nd | nd | nd | 0,33 | 0    | 0    | 37  | 125 | 150 | 1 | 0 | GI         | 0 |   |
| 35 | 1 | 43 | 143 | 26 | 0  | 6  | nd | 0    | 0,1  | nd   | 50  | 50  | nd  | 0 | 0 | Prostata   | 1 | 1 |
| 36 | 0 | 42 | 65  | 26 | 5  | 8  | nd | 0    | 0,13 | 0    | 50  | 50  | 75  | 1 | 1 | Lungcancer | 0 |   |
| 37 | 0 | 32 | 137 | 11 | 4  | 2  | 0  | 0    | 0    | 0,57 | 0   | 25  | 75  | 1 | 1 | GI         | 0 |   |
| 38 | 1 | 48 | 1   | 29 | 7  | 8  | nd | 0,5  | 0    | nd   | 100 | 300 | nd  | 0 | 0 | GI         | 0 |   |
| 39 | 1 | 17 | 137 | 20 | 3  | 6  | nd | 0,23 | 0,1  | nd   | 250 | 550 | nd  | 0 | 0 | Lungcancer | 0 |   |
